# Supplementary material for: Eco-Friendly Poly(Vinyl Alcohol) Nanofiber-Based Air Filter for Effectively Capturing Particulate Matter
Source: MDPI journal article supplement (doi:10.3390/app11093831), 2021-04-23
Supplement: s1 [file s1]

# Eco-Friendly Poly(Vinyl Alcohol) Nanofiber-Based Air Filter for Effectively Capturing Particulate Matter

Han-Jung Kim <sup>1,†</sup>, Dong-In Choi <sup>1,†</sup>, Sang-Keun Sung <sup>2</sup>, Su-Han Lee <sup>2</sup>, Sang-Jin Kim <sup>1</sup>, Junhee Kim <sup>1</sup>, Byong-Sam Han <sup>3</sup>, Dong-Ik Kim <sup>4</sup> and Yoonkap Kim <sup>1,\*</sup>

<sup>1</sup> Convergence Materials Research Center, Gumi Electronics and Information Technology Research Institute (GERI), Gumi-si 39171, Korea; hjkim0321@geri.re.kr (H.-J.K.); cdi3955@naver.com (D.-I.C.);

sjkim@geri.re.kr (S.-J.K.); junhee.kim@geri.re.kr (J.K.)

<sup>2</sup> Digital Health Care Research Center, GERI, Gumi-si 35027, Korea; sungsk@geri.re.kr (S.-K.S.); swan@geri.re.kr (S.-H.L.)

<sup>3</sup> SUNTECH Co., Ltd., Gumi-si 39166, Korea; bshan@i-suntech.com

<sup>4</sup> BRAIN GEAR Co., Ltd., Daejeon 34051, Korea; nonlinearkim@naver.com

\* Correspondence: yoonkap@geri.re.kr

† These two authors contributed equally and should be regarded as co-first authors.

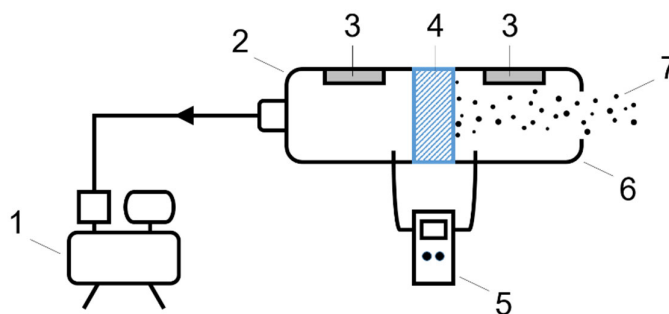

**Figure S1.** Scheme of PM filtration set. (1) Air pump; (2) Air filtered tube; (3) PM sensors; (4) Air filter; (5) Differential pressure gauge; (6) Smoke inlet; (7) Incense smoke.

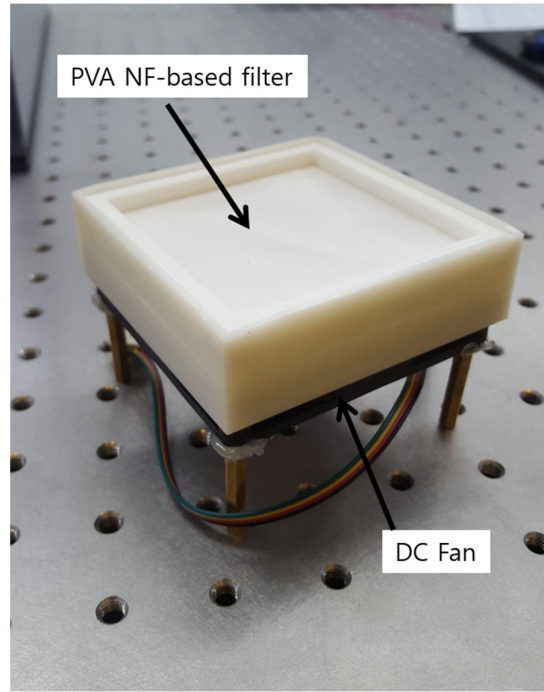

**Figure S2.** PM removal device used in chamber test.

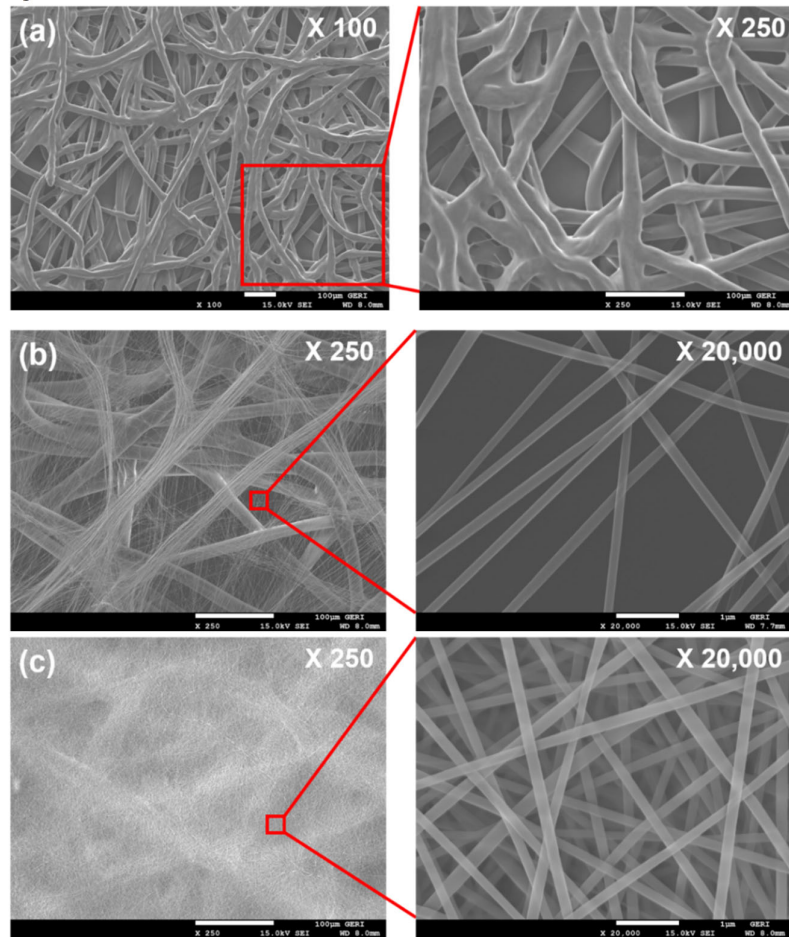

**Figure S3.** Surface FE-SEM images of samples. (a) Nonwoven fabric; (b) PVA NF-based filter (electrospinning time: 180 s); (c) PVA NF-based filter (electrospinning time: 600 s).

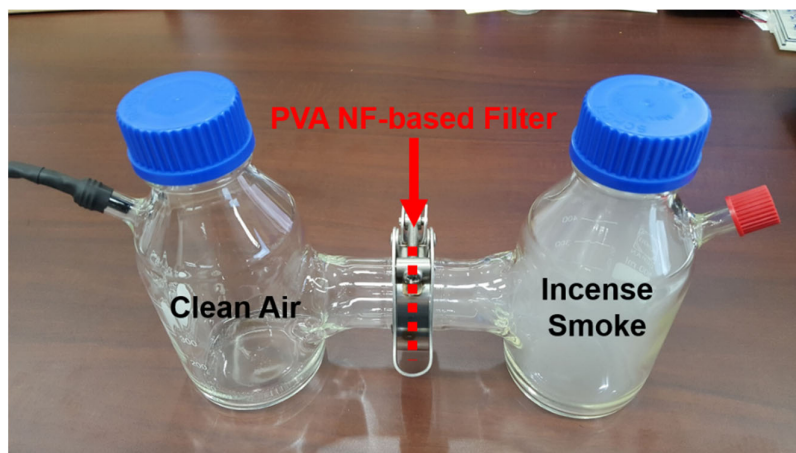

**Figure S4.** Demonstration of using PVA NF-based filter to block the PM entering from the right glass bottle to left glass bottle.

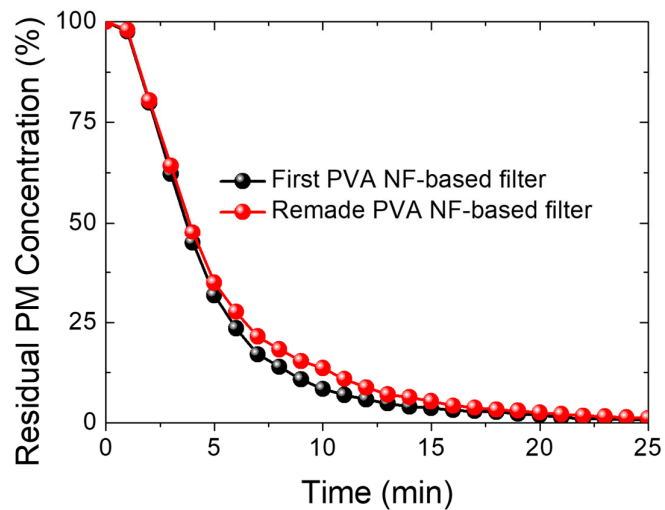

**Figure S5.** Comparison of chamber test results of PVA NF-based filter by reusing nonwoven fabric substrate.
